# Supplementary material for: Loss of maternal chromosome 11 is a signature event in SDHAF2, SDHD, and VHL-related paragangliomas, but less significant in SDHB-related paragangliomas
Source: PubMed Central journal article supplement (PMC5362423; doi:10.18632/oncotarget.14649), 2017-01-14
Supplement: oncotarget-08-14525-s001.pdf [file oncotarget-08-14525-s001.pdf]

# Loss of maternal chromosome 11 is a signature event in *SDHAF2*, *SDHD*, and *VHL*-related paragangliomas, but less significant in *SDHB*-related paragangliomas

## Supplementary Materials

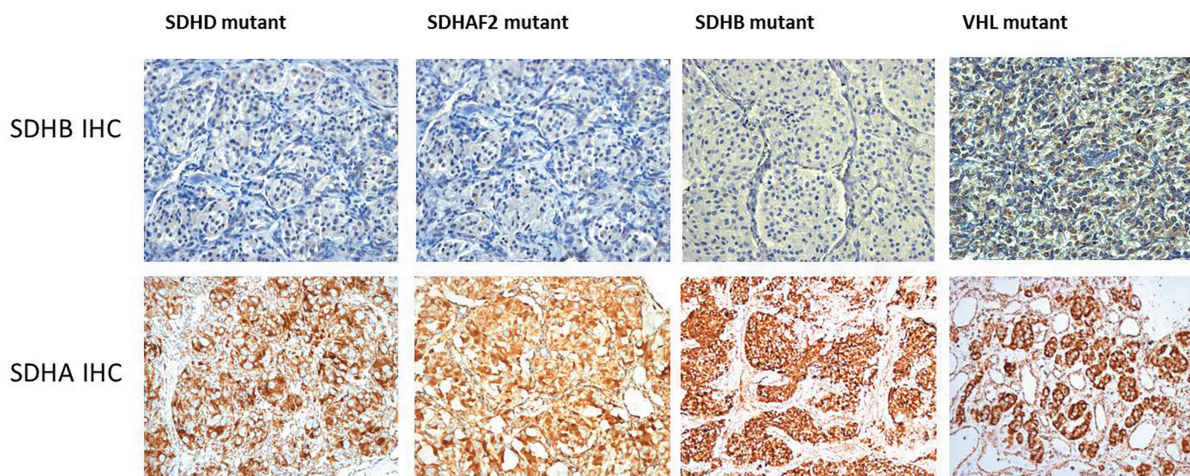

**Supplementary Figure 1: Immunohistochemical (IHC) staining of *SDHx* and *VHL*-mutated paragangliomas/pheochromocytomas.** SDHB protein expression is negative in *SDHx*-related tumors and positive in *VHL* mutant tumors. SDHA protein expression is positive in *SDHD*, *SDHAF2*, *SDHB* and *VHL*-mutated tumors.

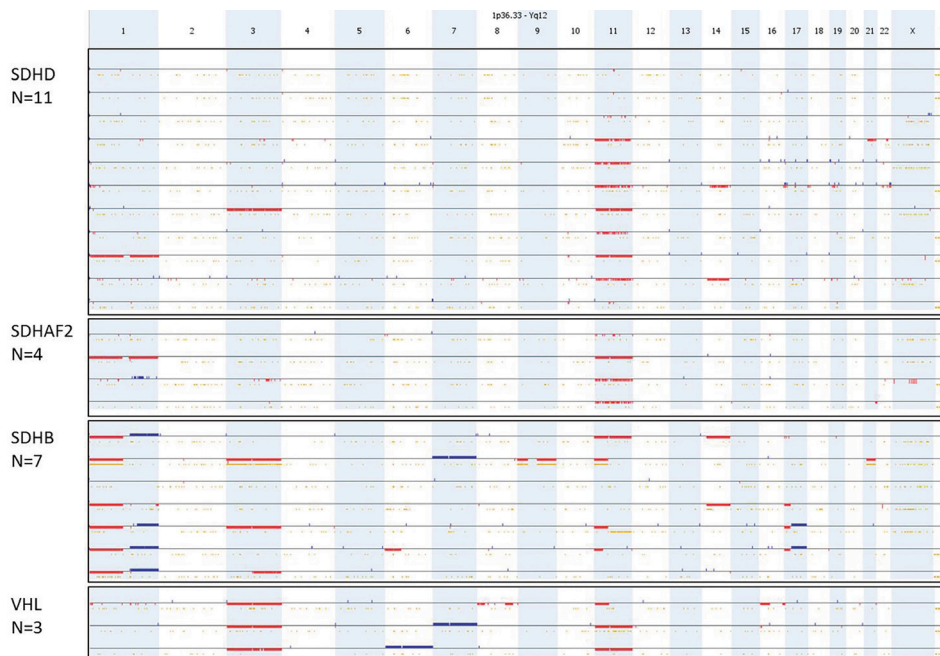

**Supplementary Figure 2: Overview of the copy-number profiles exported from Nexus Express.** Each line represents the profile of a tumor, with gains in blue and deletions in red. Samples are ordered according to the gene mutation, as indicated on the left.

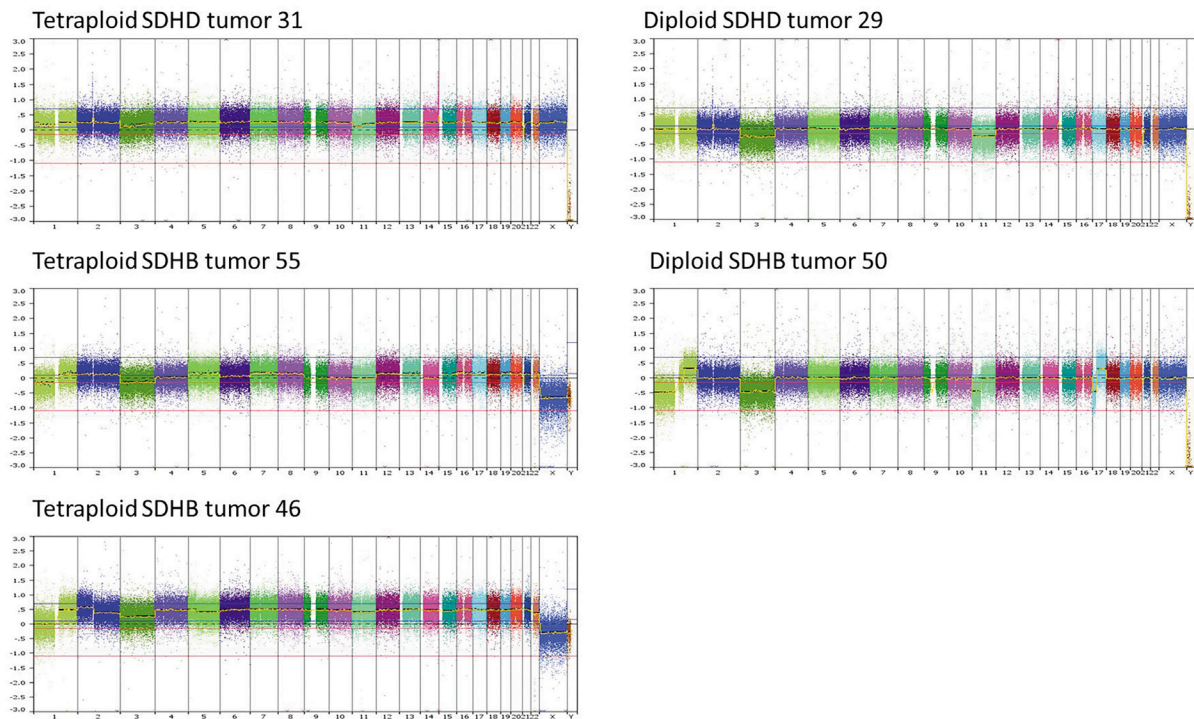

**Supplementary Figure 3: Log Ratio profiles of five different tumors.** The left panel represents three different tetraploid tumors from one *SDHD* (average log ratio 0.3) and two *SDHB* mutation carriers (tumor 55, average log ratio 0.25; tumor 46, average log ratio 0.5). For comparison, the right panel represents two diploid tumors from one *SDHD* and one *SDHB* mutation carrier, both with an average log ratio of 0.

**Supplementary Table 1: Clinical and genomic characteristics of PGL/PCC tumors.** See Supplementary\_Table\_1

**Supplementary Table 2: Microsatellite loss of heterozygosity analysis of chromosome 11 and methylation status analysis of the imprinted regions KvDMR and H19-DMR in *SDHAF2* mutant PGLs.** See Supplementary\_Table\_2

**Supplementary Table 3: Microsatellite loss of heterozygosity analysis of chromosome 11 and methylation status analysis of the imprinted regions KvDMR and H19-DMR in *SDHD* mutant PGLs.** See Supplementary\_Table\_3

**Supplementary Table 4: Microsatellite loss of heterozygosity analysis of chromosome 11 and methylation status analysis of the imprinted regions KvDMR and H19-DMR in *VHL* mutant PCCs.** See Supplementary\_Table\_4

**Supplementary Table 5: Microsatellite loss of heterozygosity analysis of chromosome 11 and methylation status analysis of the imprinted regions KvDMR and H19-DMR in *SDHB* mutant PGL/PCCs.** See Supplementary\_Table\_5

**Supplementary Table 6: Microsatellite loss of heterozygosity analysis of selected chromosomes in *SDHB* and *SDHD* mutant tumors.** See Supplementary\_Table\_6

**Supplementary Table 7 : Primer sequences of chromosome 11 microsatellite markers**

| <b>Microsatellite marker</b> | <b>Primer sequence (forward)</b> | <b>Primer sequence (reverse)</b> |
|------------------------------|----------------------------------|----------------------------------|
| D11S1363                     | GAAAATGGTATTTAGAAACCAA           | CCCAAGGGCTTACAAC                 |
| D11S4177                     | GACGGTGAACCCAGTCATT              | TGTCAGCACAGAGGCAGAGT             |
| D11S1318                     | CCCGTATGGCAACAGG                 | TGTGCATGTACATGAGTG               |
| D11S4146                     | AACACGAGGTTAAGCAGAG              | GAATGAAGAATTTTCCAAACTAC          |
| D11S1758                     | GTCAAGGTAGCCCAGGAAAT             | CCAGTGTCTCACAAACTGAGTA           |
| D11S1760                     | GATCTCAAGTGTTTCCCCAC             | AAACGATGTCTGTCCACTCA             |
| D11S1323                     | TGCTGCTTAGAATGAGTAGATGTC         | CTCTATGAAGTTGGAGTCTAGGTTG        |
| D11S932                      | TCGTATAGCACAAACCTTGGC            | CTTATCATCTCTGGGTAGTGAAGTC        |
| D11S4149                     | TGAATTATACCCCTGACCAA             | CCCAGCCAATATCAGCA                |
| D11S1346                     | GCCAAATTAAGAGGCG                 | CCCAGGGTTGTTGTGA                 |
| D11S4154                     | ATCCCTTGGCTTTCTCAGAGCAC          | GGTGCCCTAACCTCCATGT              |
| D11S4174                     | GATTAAATGCCACTATGTAGC            | GATAGCTTTCAGATGGTT               |
| D11S1335                     | CACAATCCTATGAAGCAGGT             | CTACCAATTGCTGGGTTG               |
| D11S1253                     | CCAGAGCAGCTCAAATATGAAAAGTGAAGGA  | GCTTACAGTTTACATCATCTGC           |
| D11S4076                     | CATGAATGCTCTTGTC                 | AACCCCTGGAAAATAGACT              |
| D11S4205                     | GATAGATACGTTAATTTGCTTCACC        | GCTTAGTTGCTATTACATGATGACC        |
| D11S913                      | CATTTGGGAAATCCAGAAGA             | TAGGTGTCTTATTTTTTGTGCTTC         |
| D11S2002                     | CATGGCCCTTCTTTTCATAG             | AATGAGGTCTTACTTTGTGTC            |
| D11S1358                     | ACAACCTGGATGAACCC                | ACTTTCTGTCTTTATGATTTGATT         |
| D11S923                      | ATCTATAATATCTGGAAGGTACTGG        | ATTAGGGCTGGATTGAGG               |
| D11S1793                     | AGTCATGCATCCTCCCTGTA             | ATCCTGAACACATTCTCAA              |
| D11S4127                     | ATGAGAAGTGCCATCCAGC              | ACTATGCCAGTGTGTGTGC              |
| D11S934                      | GCTGTCCCTGACAACTACATGC           | TTCCATCAGAACTGGGAATGAG           |
| D11S4098                     | TCCAGGAACATCAGC                  | TTGCATTTACCAAAGA                 |
